# Supplementary material for: Assessment of the Impacts of Plant Growth-Promoting Micro-Organisms on Potato Farming in Different Climatic Conditions in Morocco
Source: MDPI journal article supplement (doi:10.3390/microbiolres14040141), 2023-12-09
Supplement: s1 [file s1]

## Supplementary materials S

**Table S1.** Mean values of agronomic parameters with corresponding Standard Errors for each Treatment.

|                |            | Treatment |            |            |            |            |            |            |            |            |            |            |
|----------------|------------|-----------|------------|------------|------------|------------|------------|------------|------------|------------|------------|------------|
|                |            |           | GAJ222     | GAB111     | 2066-7     | Ach1-1     | Ach1-2     | GLM10      | 2332-A1    | 2515-3     | Control+   | Control-   |
| Vigor          | Ain        | Siena     | 3.0±0.6    | 1.7±0.6    | 2.0±0.6    | 4.3±0.6    | 4.0±0.6    | 3.0±0.6    | 1.7±0.6    | 2.0±0.6    | 3.0±0.6    | 2.0±0.6    |
|                |            | Bellini   | 4.0±0.6    | 4.0±0.6    | 1.3±0.6    | 3.0±0.6    | 3.0±0.6    | 2.0±0.6    | 1.0±0.6    | 1.0±0.6    | 2.0±0.6    | 1.0±0.6    |
|                | Lannocneur | Siena     | 3.0±0.6    | 2.0±0.6    | 1.7±0.6    | 4.0±0.6    | 3.7±0.6    | 3.0±0.6    | 2.0±0.6    | 2.0±0.6    | 3.0±0.6    | 2.0±0.6    |
|                |            | Bellini   | 2.0±0.6    | 1.0±0.6    | 1.0±0.6    | 3.0±0.6    | 2.7±0.6    | 2.0±0.6    | 1.0±0.6    | 1.0±0.6    | 2.0±0.6    | 1.3±0.6    |
| Height         | Ain        | Siena     | 55.5±2.2   | 43.7±2.2   | 41.4±2.2   | 63.7±2.2   | 61.4±2.2   | 55.9±2.2   | 53.1±2.2   | 49.8±2.2   | 57.7±2.2   | 54.5±2.2   |
|                |            | Bellini   | 45.5±2.2   | 33.7±2.2   | 31.4±2.2   | 53.7±2.2   | 51.4±2.2   | 45.9±2.2   | 43.1±2.2   | 39.8±2.2   | 47.7±2.2   | 44.5±2.2   |
|                | Lannocneur | Siena     | 35.1±2.2   | 27.8±2.2   | 24.4±2.2   | 37.9±2.2   | 36.1±2.2   | 35.9±2.2   | 26.9±2.2   | 25.0±2.2   | 35.3±2.2   | 33.8±2.2   |
|                |            | Bellini   | 25.1±2.2   | 17.8±2.2   | 14.4±2.2   | 27.9±2.2   | 26.1±2.2   | 25.9±2.2   | 16.9±2.2   | 15.0±2.2   | 25.3±2.2   | 23.8±2.2   |
| N°Stems        | Ain        | Siena     | 5.3±0.9    | 4.0±0.9    | 4.3±0.9    | 6.7±0.9    | 6.3±0.9    | 5.0±0.9    | 4.0±0.9    | 4.3±0.9    | 5.3±0.9    | 4.3±0.9    |
|                |            | Bellini   | 4.3±0.9    | 3.0±0.9    | 3.3±0.9    | 5.7±0.9    | 5.3±0.9    | 4.0±0.9    | 3.0±0.9    | 3.3±0.9    | 4.3±0.9    | 3.3±0.9    |
|                | Lannocneur | Siena     | 3.3±0.9    | 2.7±0.9    | 2.3±0.9    | 4.7±0.9    | 4.0±0.9    | 3.3±0.9    | 2.0±0.9    | 2.0±0.9    | 3.7±0.9    | 3.0±0.9    |
|                |            | Bellini   | 3.3±0.9    | 2.7±0.9    | 2.3±0.9    | 4.7±0.9    | 4.0±0.9    | 3.3±0.9    | 2.0±0.9    | 2.0±0.9    | 3.7±0.9    | 3.0±0.9    |
| N°Leaves       | Ain        | Siena     | 22.3±1.3   | 19.7±1.3   | 18.0±1.3   | 25.7±1.3   | 25.0±1.3   | 22.7±1.3   | 17.3±1.3   | 17.3±1.3   | 21.7±1.3   | 20.0±1.3   |
|                |            | Bellini   | 12.3±1.3   | 9.7±1.3    | 8.0±1.3    | 15.7±1.3   | 15.0±1.3   | 12.7±1.3   | 7.3±1.3    | 7.3±1.3    | 11.7±1.3   | 10.0±1.3   |
|                | Lannocneur | Siena     | 14.3±1.3   | 13.7±1.3   | 13.0±1.3   | 17.0±1.3   | 16.3±1.3   | 14.0±1.3   | 13.0±1.3   | 13.0±1.3   | 14.3±1.3   | 13.3±1.3   |
|                |            | Bellini   | 4.3±1.3    | 3.3±1.3    | 3.0±1.3    | 7.0±1.3    | 6.3±1.3    | 4.0±1.3    | 3.0±1.3    | 3.0±1.3    | 4.3±1.3    | 3.3±1.3    |
| N°Leaflet      | Ain        | Siena     | 257.0±21.5 | 212.3±21.5 | 215.7±21.5 | 325.3±21.5 | 320.0±21.5 | 252.3±21.5 | 183.3±21.5 | 186.0±21.5 | 256.0±21.5 | 160.7±21.5 |
|                |            | Bellini   | 257.0±21.5 | 212.3±21.5 | 215.7±21.5 | 325.3±21.5 | 320.0±21.5 | 252.3±21.5 | 183.3±21.5 | 186.0±21.5 | 256.0±21.5 | 160.7±21.5 |
|                | Lannocneur | Siena     | 275.7±21.5 | 229.7±21.5 | 230.0±21.5 | 332.3±21.5 | 320.3±21.5 | 284.0±21.5 | 239.3±21.5 | 216.3±21.5 | 275.0±21.5 | 203.0±21.5 |
|                |            | Bellini   | 175.7±21.5 | 129.7±21.5 | 130.0±21.5 | 232.3±21.5 | 220.3±21.5 | 184.0±21.5 | 139.3±21.5 | 116.3±21.5 | 175.0±21.5 | 103.0±21.5 |
| Chlorophyll    | Ain        | Siena     | 40.0±2.4   | 38.8±2.4   | 37.1±2.4   | 46.8±2.4   | 44.4±2.4   | 41.9±2.4   | 30.9±2.4   | 35.8±2.4   | 42.4±2.4   | 39.4±2.4   |
|                |            | Bellini   | 30.0±2.4   | 28.8±2.4   | 27.1±2.4   | 36.8±2.4   | 34.4±2.4   | 31.9±2.4   | 20.9±2.4   | 25.8±2.4   | 32.4±2.4   | 29.4±2.4   |
|                | Lannocneur | Siena     | 22.8±2.4   | 18.7±2.4   | 17.7±2.4   | 28.3±2.4   | 27.8±2.4   | 22.4±2.4   | 18.4±2.4   | 16.2±2.4   | 22.5±2.4   | 20.4±2.4   |
|                |            | Bellini   | 12.8±2.4   | 8.7±2.4    | 7.7±2.4    | 18.3±2.4   | 17.8±2.4   | 12.4±2.4   | 8.4±2.4    | 6.2±2.4    | 12.5±2.4   | 10.4±2.4   |
| Yield          | Ain        | Siena     | 16.9±1.1   | 14.1±1.1   | 14.1±1.1   | 19.9±1.1   | 19.0±1.1   | 17.0±1.1   | 11.1±1.1   | 14.7±1.1   | 17.3±1.1   | 14.6±1.1   |
|                |            | Bellini   | 16.2±1.1   | 13.1±1.1   | 13.0±1.1   | 18.9±1.1   | 18.0±1.1   | 16.0±1.1   | 10.1±1.1   | 13.7±1.1   | 16.3±1.1   | 13.6±1.1   |
|                | Lannocneur | Siena     | 12.1±1.1   | 11.9±1.1   | 11.0±1.1   | 13.5±1.1   | 13.1±1.1   | 12.6±1.1   | 11.9±1.1   | 13.6±1.1   | 12.7±1.1   | 11.6±1.1   |
|                |            | Bellini   | 11.1±1.1   | 10.9±1.1   | 10.0±1.1   | 12.5±1.1   | 12.1±1.1   | 11.6±1.1   | 10.9±1.1   | 12.6±1.1   | 11.7±1.1   | 10.6±1.1   |
| Damaged Tubers | Ain        | Siena     | 4.0±1.1    | 5.3±1.1    | 7.0±1.1    | 1.7±1.1    | 2.0±1.1    | 4.0±1.1    | 5.0±1.1    | 6.0±1.1    | 4.0±1.1    | 7.3±1.1    |
|                |            | Bellini   | 3.0±1.1    | 4.3±1.1    | 6.0±1.1    | 1.0±1.1    | 1.0±1.1    | 3.0±1.1    | 4.0±1.1    | 5.0±1.1    | 3.0±1.1    | 6.3±1.1    |
|                | Lannocneur | Siena     | 5.0±1.1    | 6.7±1.1    | 8.3±1.1    | 3.3±1.1    | 3.3±1.1    | 5.0±1.1    | 6.0±1.1    | 8.0±1.1    | 5.0±1.1    | 8.7±1.1    |
|                |            | Bellini   | 4.0±1.1    | 5.7±1.1    | 7.3±1.1    | 2.3±1.1    | 2.3±1.1    | 4.0±1.1    | 5.0±1.1    | 7.0±1.1    | 5.0±1.1    | 7.7±1.1    |

Table S2. Analysis of variance (ANOVA) for all agronomic parameters.

|           | Vigor       |     |        |      | Height       |     |         |       | N°Stems     |     |        |       | N°Leaves    |     |         |       | N°Leaflets    |     |         |       | Chlorophyll |     |         |       |
|-----------|-------------|-----|--------|------|--------------|-----|---------|-------|-------------|-----|--------|-------|-------------|-----|---------|-------|---------------|-----|---------|-------|-------------|-----|---------|-------|
|           | Type III SS | ddl | D      | Sig. | Type III SS  | ddl | D       | Sig.  | Type III SS | ddl | D      | Sig.  | Type III SS | ddl | D       | Sig.  | Type III SS   | ddl | D       | Sig.  | Type III SS | ddl | D       | Sig.  |
| Site      | 2,408       | 1   | 2,369  | ,128 | 14327,045*** | 1   | 944,137 | ,000  | 104,533***  | 1   | 41,953 | ,000  | 1380,408*** | 1   | 276,303 | ,000  | 175950,208*** | 1   | 126,775 | ,000  | 9968,164*** | 1   | 583,357 | ,000  |
| Variety   | 14,008***   | 1   | 13,779 | ,000 | 2992,005***  | 1   | 197,170 | ,000  | 30,000**    | 1   | 12,040 | ,001  | 3010,008*** | 1   | 602,484 | ,000  | 301702,408*** | 1   | 217,382 | ,000  | 2995,002*** | 1   | 175,274 | ,000  |
| Treatment | 70,508***   | 9   | 7,706  | ,000 | 3770,912***  | 9   | 27,611  | ,000  | 86,533***   | 9   | 3,859  | ,000  | 512,742***  | 9   | 11,403  | ,000  | 262226,675*** | 9   | 20,993  | ,000  | 1865,165*** | 9   | 12,128  | ,000  |
| Site--    | 1,875       | 1   | 1,844  | ,178 | ,000         | 1   | ,000    | ,996  | 0,000       | 1   | 0,000  | 1,000 | ,008        | 1   | ,002    | ,968  | 2,408         | 1   | ,002    | ,967  | ,002        | 1   | ,000    | ,991  |
| Variety   |             |     |        |      |              |     |         |       |             |     |        |       |             |     |         |       |               |     |         |       |             |     |         |       |
| Site--    | 6,842       | 9   | ,748   | ,664 | 360,836      | 9   | 2,642   | ,010  | 3,467       | 9   | ,155   | ,998  | 84,008      | 9   | 1,868   | ,069  | 7168,208      | 9   | ,574    | ,815  | 144,298     | 9   | ,938    | ,497  |
| Treatment |             |     |        |      |              |     |         |       |             |     |        |       |             |     |         |       |               |     |         |       |             |     |         |       |
| Variety-- | 8,908       | 9   | ,974   | ,468 | ,010         | 9   | ,000    | 1,000 | 0,000       | 9   | 0,000  | 1,000 | ,075        | 9   | ,002    | 1,000 | 24,675        | 9   | ,002    | 1,000 | ,024        | 9   | ,000    | 1,000 |
| Treatment |             |     |        |      |              |     |         |       |             |     |        |       |             |     |         |       |               |     |         |       |             |     |         |       |
| Site--    | 9,708       | 9   | 1,061  | ,401 | ,015         | 9   | ,000    | 1,000 | 0,000       | 9   | 0,000  | 1,000 | ,075        | 9   | ,002    | 1,000 | 24,675        | 9   | ,002    | 1,000 | ,014        | 9   | ,000    | 1,000 |
| Variety-- |             |     |        |      |              |     |         |       |             |     |        |       |             |     |         |       |               |     |         |       |             |     |         |       |
| Treatment |             |     |        |      |              |     |         |       |             |     |        |       |             |     |         |       |               |     |         |       |             |     |         |       |
| Error     | 81,333      | 80  |        |      | 1213,980     | 80  |         |       | 199,333     | 80  |        |       | 399,680     | 80  |         |       | 111031,333    | 80  |         |       | 1367,007    | 80  |         |       |

\*\*,\*\*\* Significance at p-value < 0.01 and p-value < 0.001, respectively.
